# Supplementary material
Source: Springer Nature journal article supplement (https://www.springermedizin.de/resource/supplementary/12933_2012_563_MOESM3_ESM.pdf/9538490)
Supplement: MOESM3 [file 9538490]

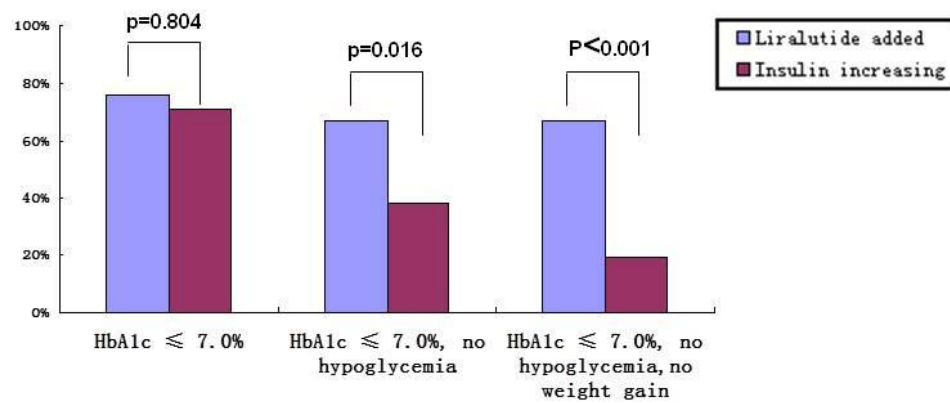

**Figure 2** Percentage of patients achieving composite endpoint of HbA1c  $\leq$  7.0%, no hypoglycemia, no weight gain.
